# Supplementary material for: HD2C interacts with HDA6 and is involved in ABA and salt stress response in Arabidopsis
Source: PubMed Central journal article supplement — J Exp Bot. 2012 Feb 24;63(8):3297–306. doi: 10.1093/jxb/ers059 (PMC3350937; doi:10.1093/jxb/ers059), 2012-02-24

**HD2C interacts with HDA6 and is involved in ABA and salt stress response in Arabidopsis**

*Ming Luo, Yu-Yuan Wang, Xuncheng Liu, Songguang Yang, Qing Lu, Yuhai Cui, and Keqiang Wu*

**Supplementary Material**

## Supplementary Tables:

**Table S1.** Primers used for RT-PCR analysis

| Genes         | Primers                                                                                        |
|---------------|------------------------------------------------------------------------------------------------|
| <i>HD2A</i>   | 5' – AATTGAGCTCTTAGCTCTGGTTTGCAGCCTTTC – 3' and<br>5' – GCTCTAGACATGGGCTATTCTGAGGAAGAAGAG – 3' |
| <i>HD2B</i>   | 5' – CAGCTTCTACTCCTCAGAAG – 3' and<br>5' – AATTAGATCTCTACCCTTTCCCTTGCCC – 3'                   |
| <i>HD2C</i>   | 5' – TGACGCTGACGGTAGTGAAG – 3' and<br>5' – AATTAGATCTGCACTGTGTTTGGCCTTTG – 3'                  |
| <i>HD2D</i>   | 5' – TGATCTCTACTTAGGGCACG – 3' and<br>5' – AATTGAGCTCCTACTTTTTGCAAGAGGGAC – 3'                 |
| <i>ABI1</i>   | 5' – GCCATGTCGAGATCCATTGG – 3' and<br>5' – AACGATGCATCCCCAGCCAC – 3'                           |
| <i>ABI2</i>   | 5' – CAAGATCCATTGGCGATAGATACC – 3' and<br>5' – CCTCTTTTCTCCGCCGGAAG – 3'                       |
| <i>AtERF4</i> | 5' – CGGCTACTACTAACCAGACCC – 3' and<br>5' – TCGCTGAAGGCACAATAA – 3'                            |
| <i>MYB2</i>   | 5' – AGCCGGGTTTCGTTCAATTC – 3' and<br>5' – CGAATACGATGTCGTATCGG – 3'                           |
| <i>MYC2</i>   | 5' – CTAAACCAAAGATTCTACGCG – 3' and<br>5' – GGTTCCTTGATTTGGAGTTTCTC – 3'                       |
| <i>UBQ</i>    | 5' – GATCTTTGCCGAAAACAATTGGAGGATGGT – 3' and<br>5' – CGACTTGTCATTAGAAAAGAAAGAGATAACAGG – 3'    |

**Table S2.** Primers used for Chip assay

| Genes           | Primers                                                                                 |
|-----------------|-----------------------------------------------------------------------------------------|
| <i>Actin2/7</i> | 5' – CGTTTCGCTTTCCTTAGTGTTAGCT– 3' and<br>5' – AGCGAACGGATCTAGAGACTCACCTTG – 3'         |
| <i>Ta3</i>      | 5' – GATTCCTACTGTAAAGAACATGGCATTGAGAGA – 3' and<br>5' – TCCAAATTCCTGAGGTGCTTGTAACC – 3' |
| <i>ABI1 P</i>   | 5' – GATATTTTACCGGTGGTC – 3' and<br>5' – GACGTGTCGTAGTCCGAGTT – 3'                      |
| <i>ABI1 E</i>   | 5' – CTTGTCTTCCTAGCTTCTTC – 3' and<br>5' – CCTTTACCCAATCTGATCCC – 3'                    |
| <i>ABI2 P</i>   | 5' – CTAGTGTGGTCAGTGTAGATG – 3' and<br>5' – GTGTAACATGCCATATGTCAC – 3'                  |
| <i>ABI2 E</i>   | 5' – CTCTCCTTTCTCTTCCCAAC – 3' and<br>5' – GAGGGTCAGTGAATGGTCTG – 3'                    |
| <i>AtERF4 P</i> | 5' – GTGTACTCACTAGAGCAAGC – 3' and<br>5' – CCGTACAGTATTTGACGC – 3'                      |
| <i>AtERF4 E</i> | 5' – ACCATTTTCAGGCTTTGAC – 3' and<br>5' – AACGCCTCTGTAACGAA– 3'                         |

## Legends of supplementary figures

### **Figure S1.** Negative controls in BiFC assays

As negative controls, HD2C and HDA6 fused with YN or YC and the empty vector (YN and YC) were co-transfected into protoplasts and visualized using confocal microscope as negative controls. No YFP signals were detected.

### **Figure S2.** Expression of *MYB2* and *MYC2* determined by real-time RT-PCR.

Total RNA was isolated from leaf tissues. Asterisks mark values that are significantly different from the wild type (t- test, \*\*P <0.01, \*P<0.05). The experiment was repeated three times with similar results.

**Figure S3.** Two additional independent analyses of histone acetylation and methylation of *ABI1* and *ABI2* in *hda6* plants. Relative levels of H3K9K14Ac (A) and H3K9Me2 (B) in *ABI1* and *ABI2* promoter and first exon regions were determined. The amounts of DNA after ChIP were quantified and normalized to an internal control *ACTIN2* for H3K9K14Ac or *Ta3* for H3K9Me2. Error bars represent standard errors. Asterisks mark values that are significantly different from the wild type (t- test, \*P<0.05).

Supplementary Figures:

Figure S1

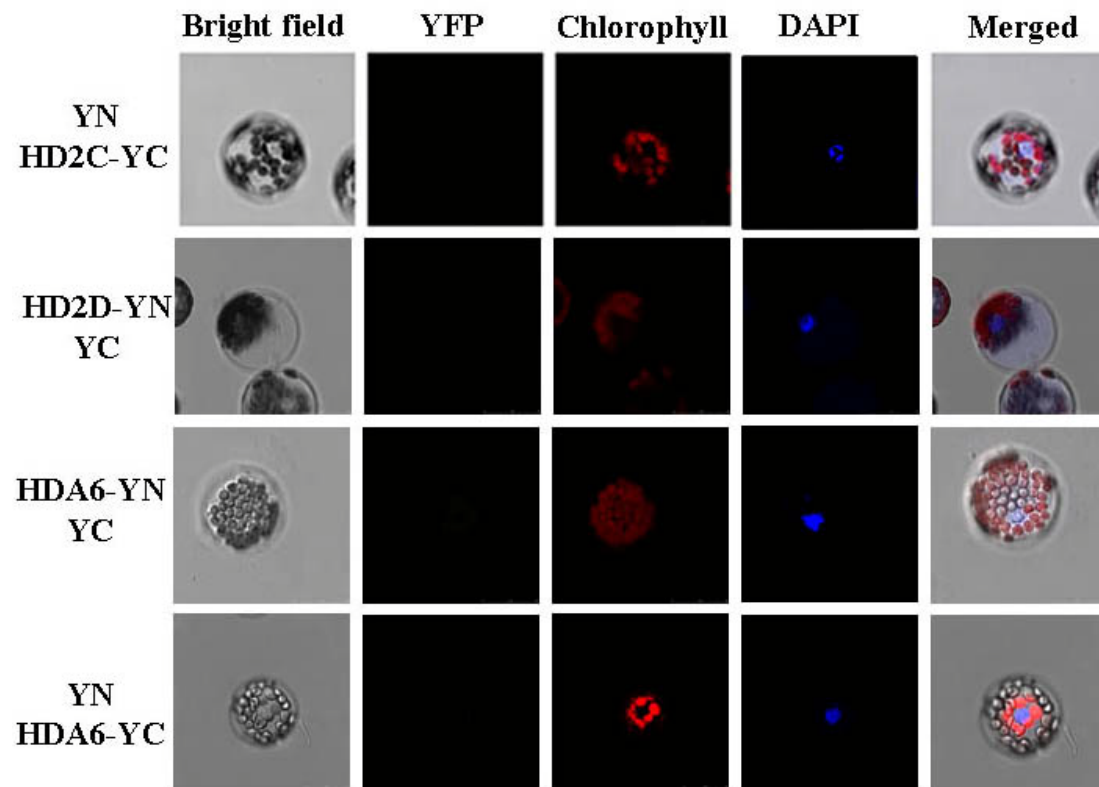

Figure S2

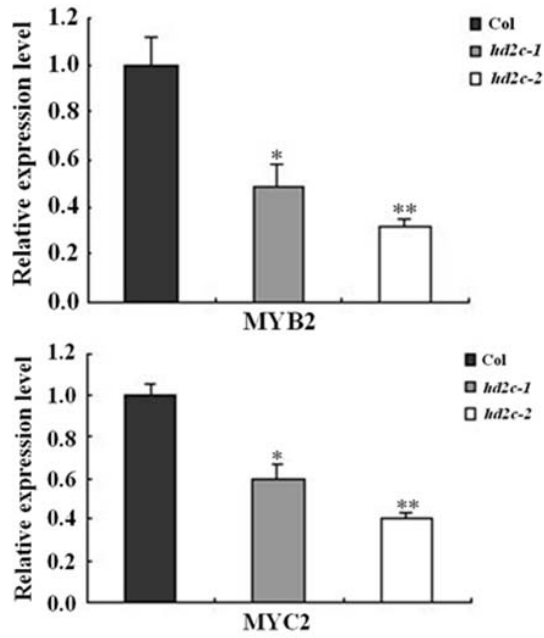

Figure S3

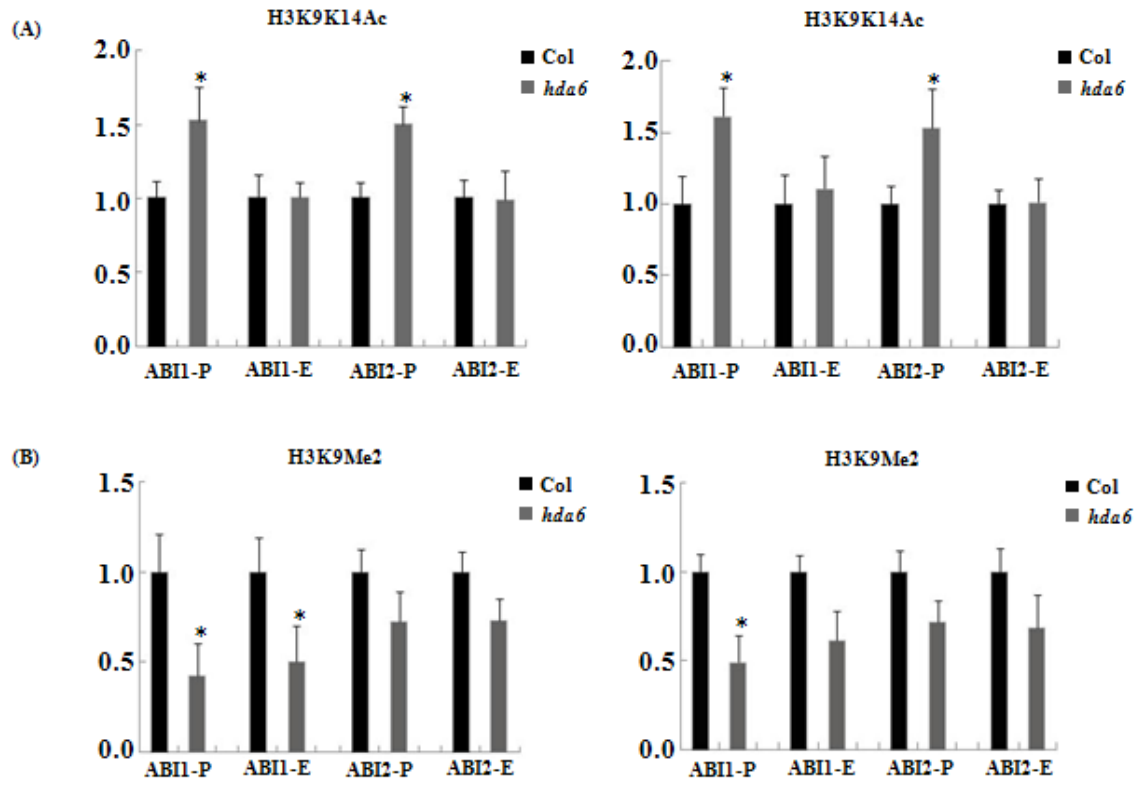

Supplement: supp_ers059_00070946-file001.pdf [file supp_ers059_00070946-file001.pdf]
